# Supplementary material
Source: PubMed Central journal article supplement (PMC3823187)

# Suppl. Fig. S1

**A**

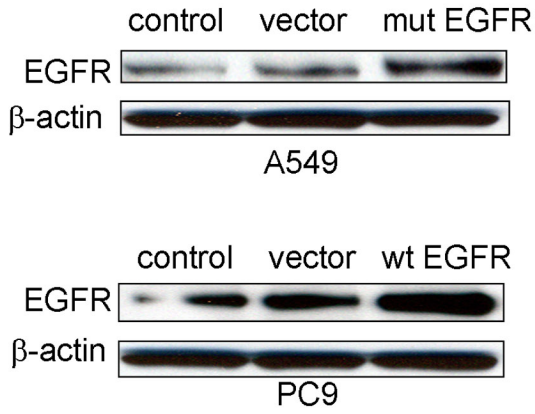

**B**

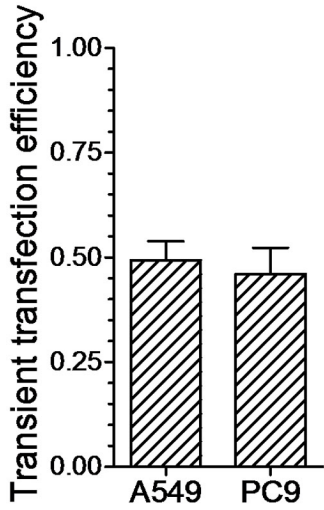

**C**

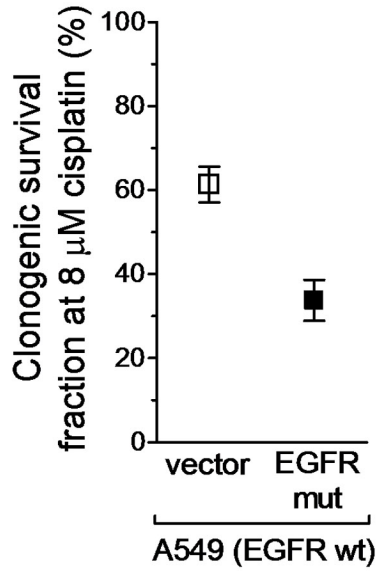

**D**

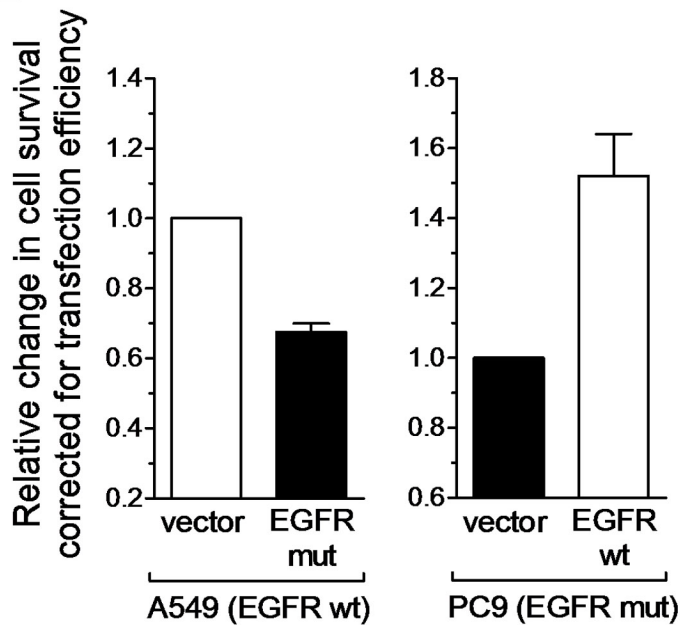

**E**

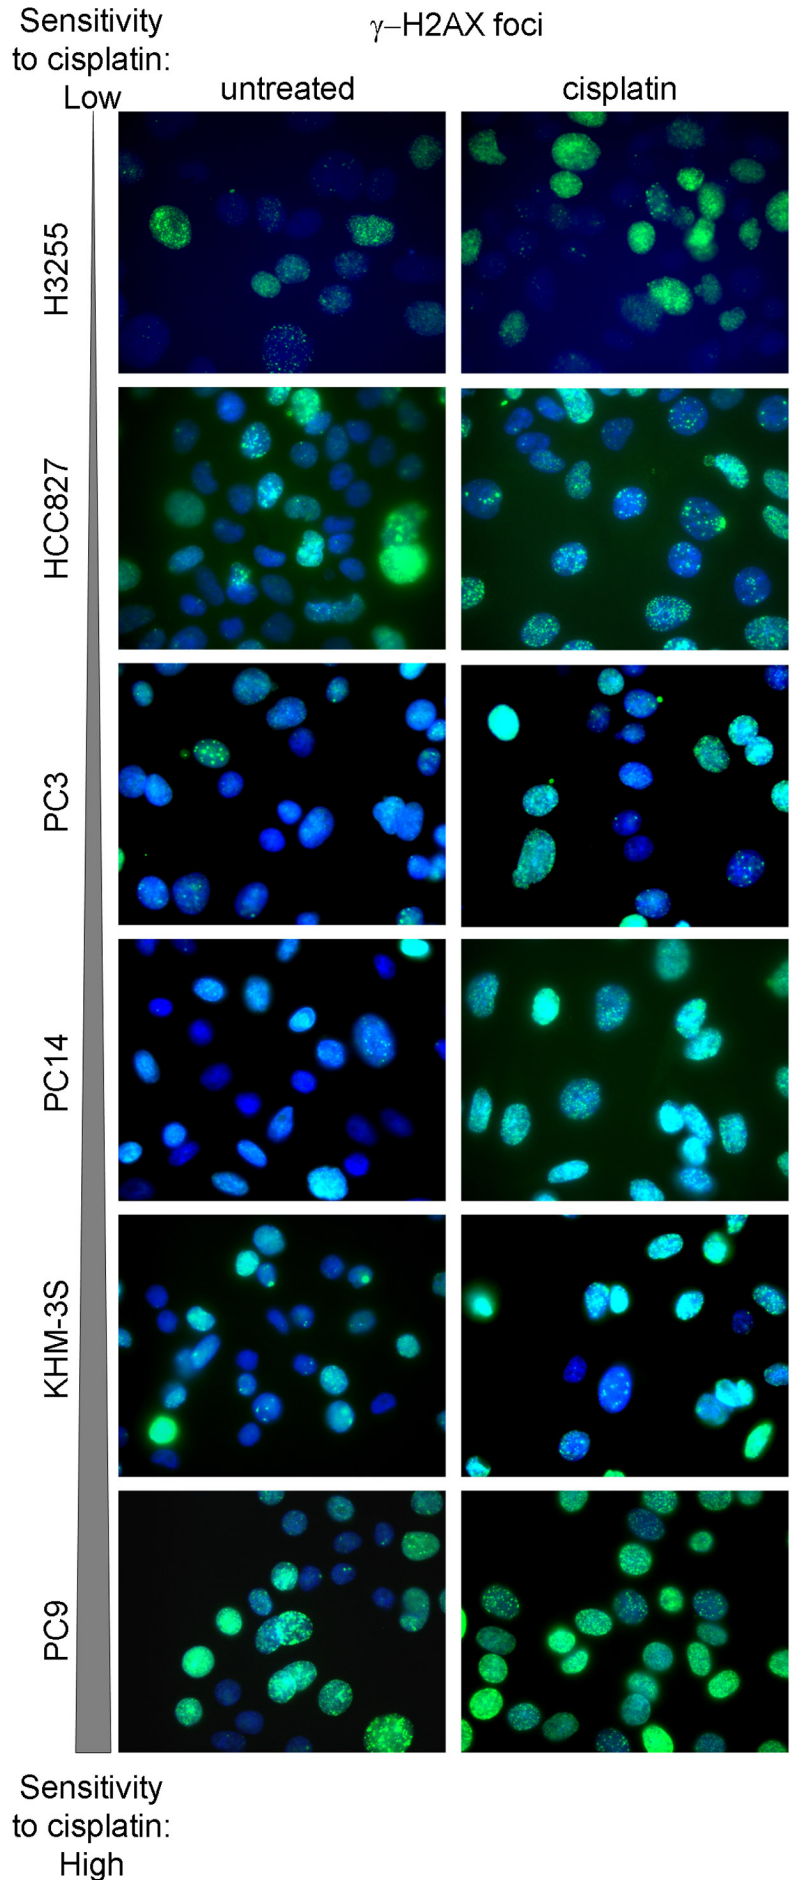

# Suppl. Fig. S1 continued

**F**

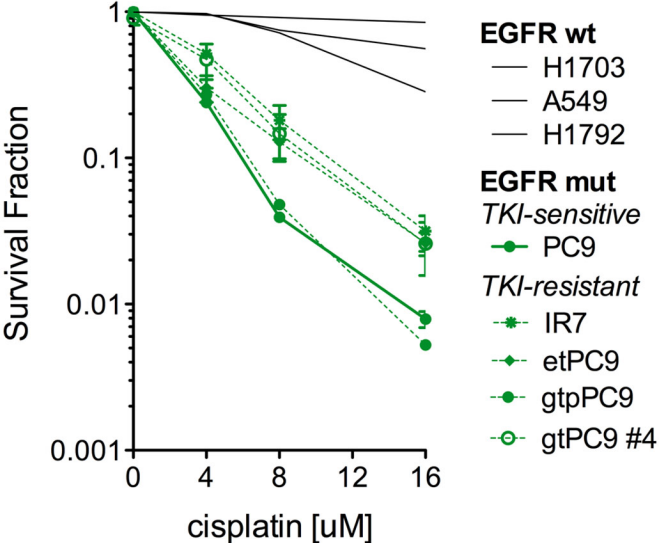

**G**

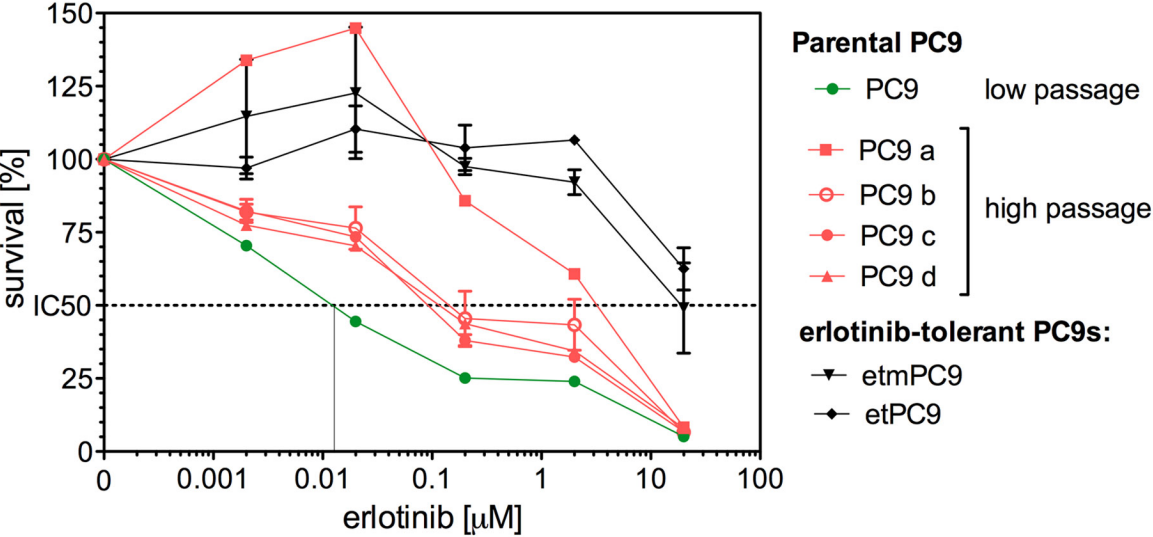

# Suppl. Fig. S2

## A

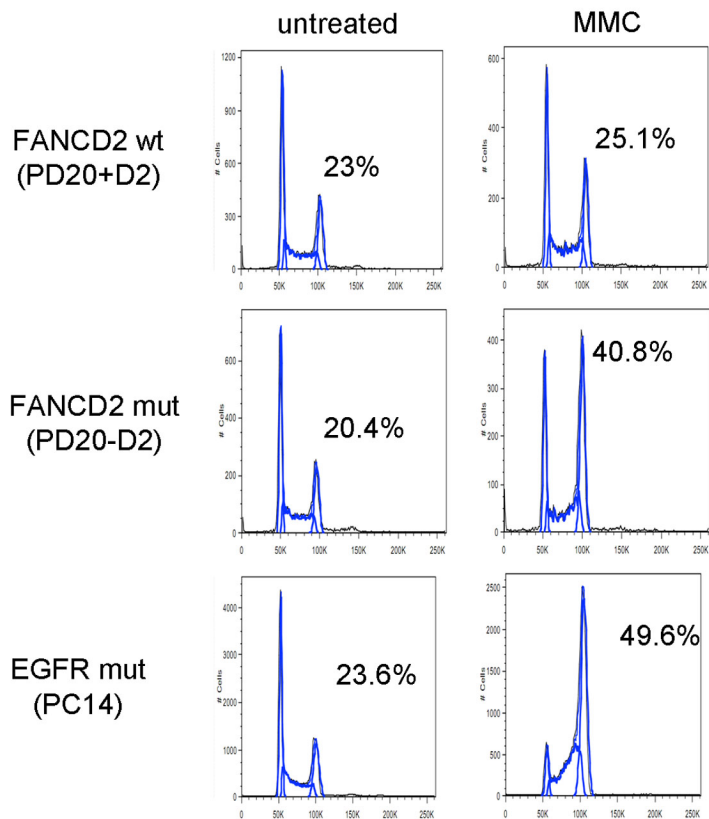

## B

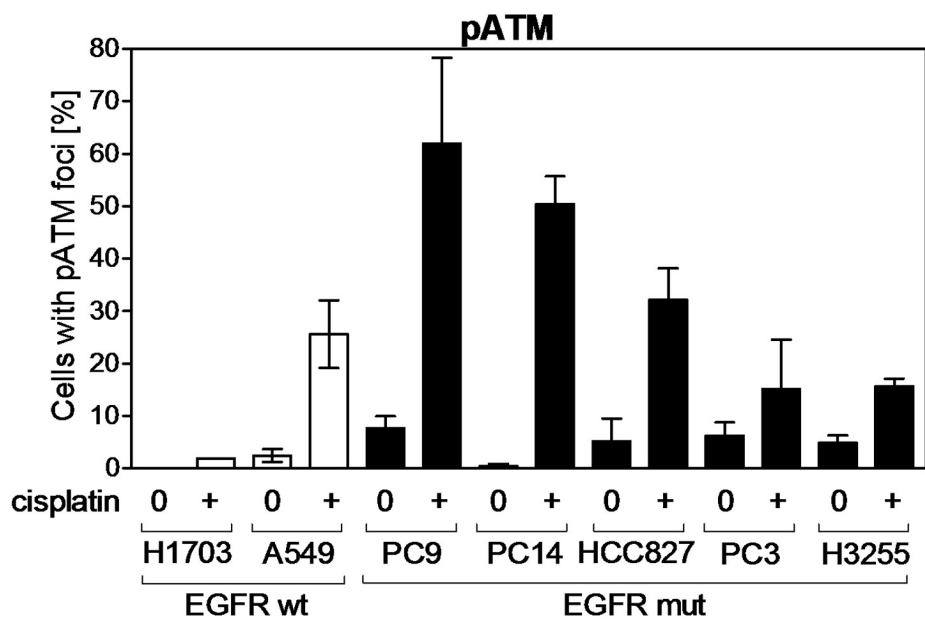

# Suppl. Fig. S3

## A

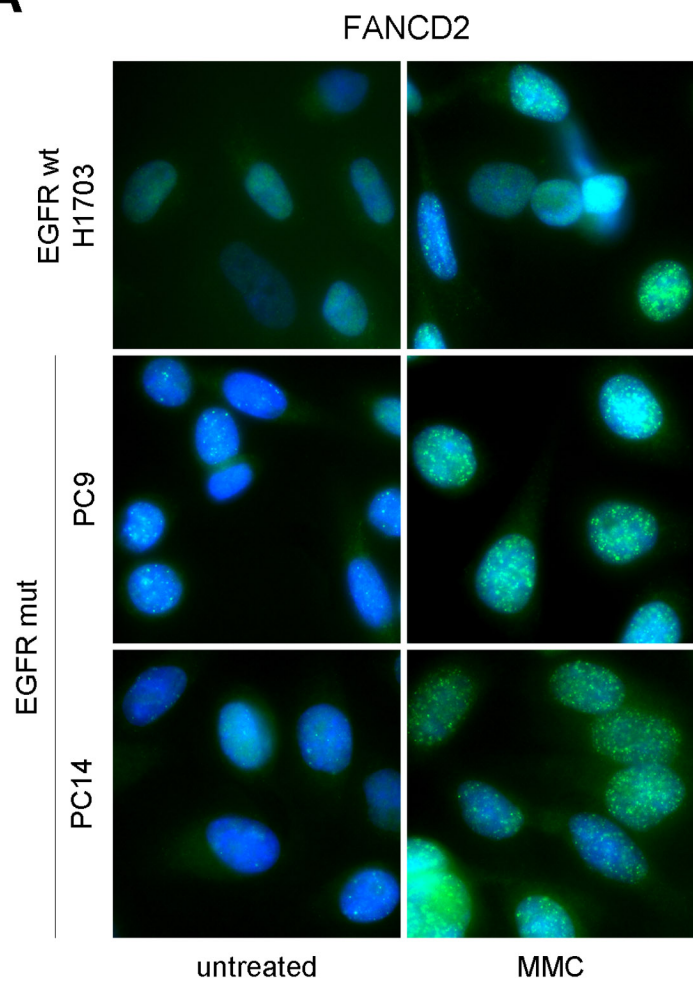

## B

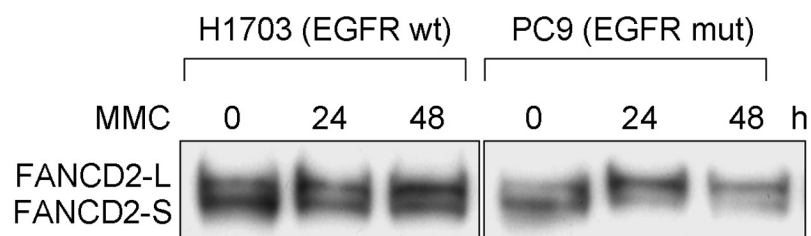

## C

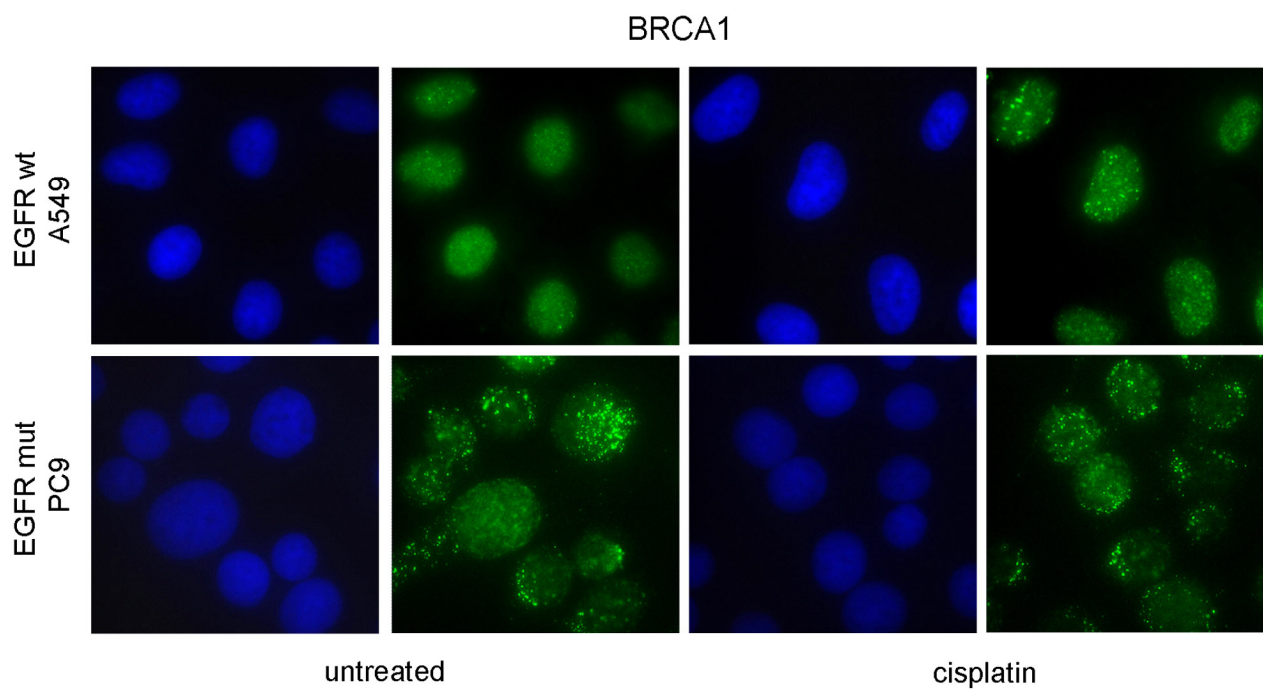

# Suppl. Fig. S4

**A**

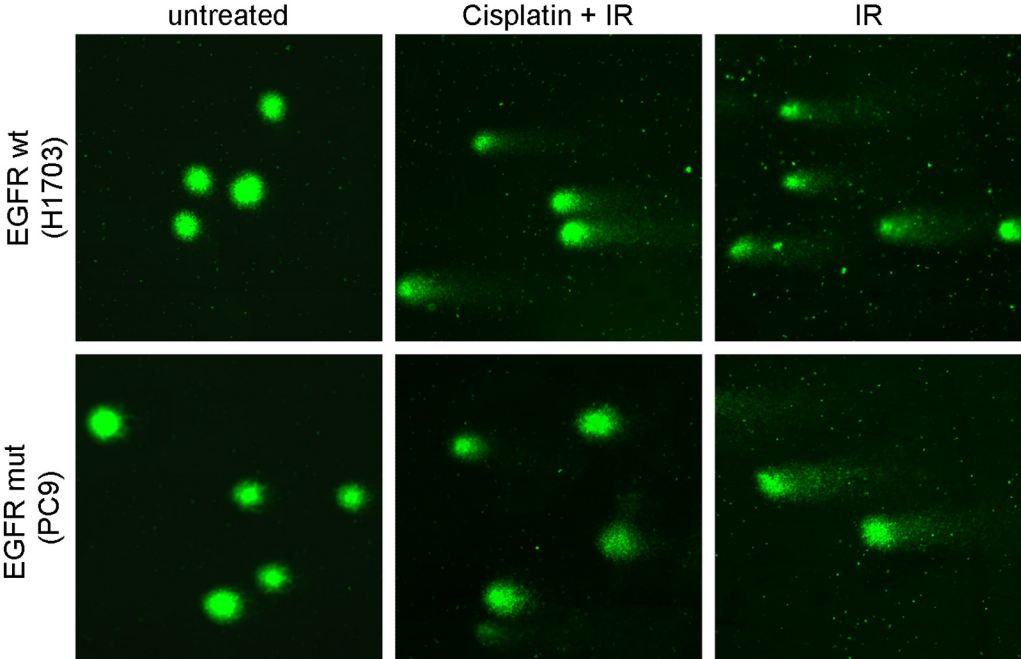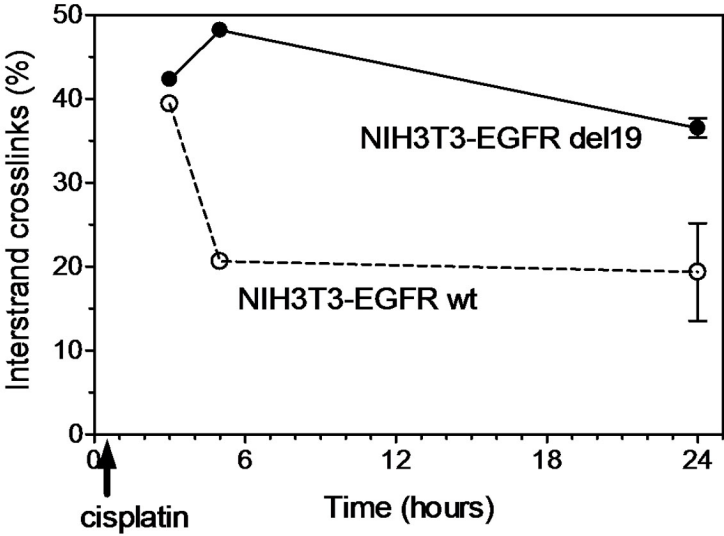

**B**

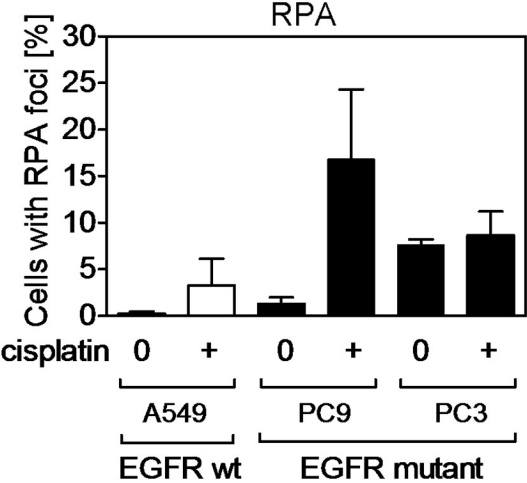

# Suppl. Fig. S4 continued

## C

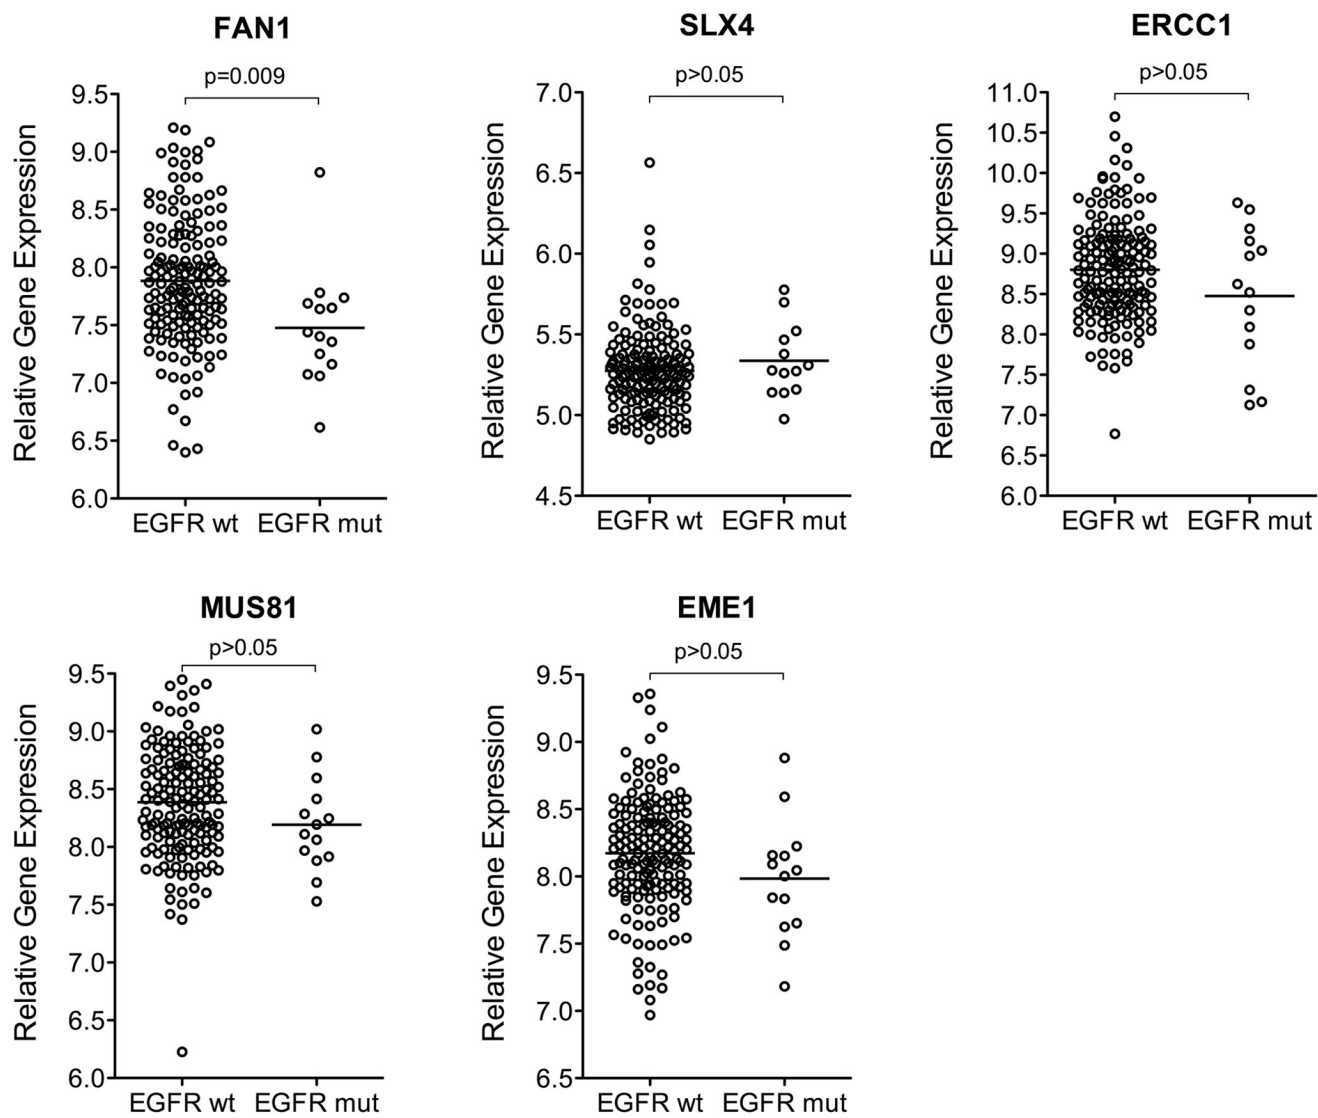

## D

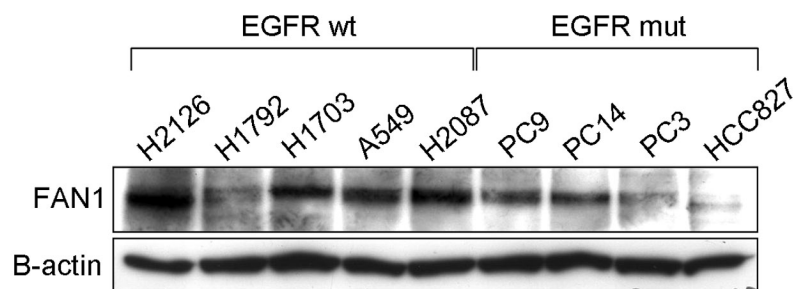

Suppl. Fig. S4 continued

E

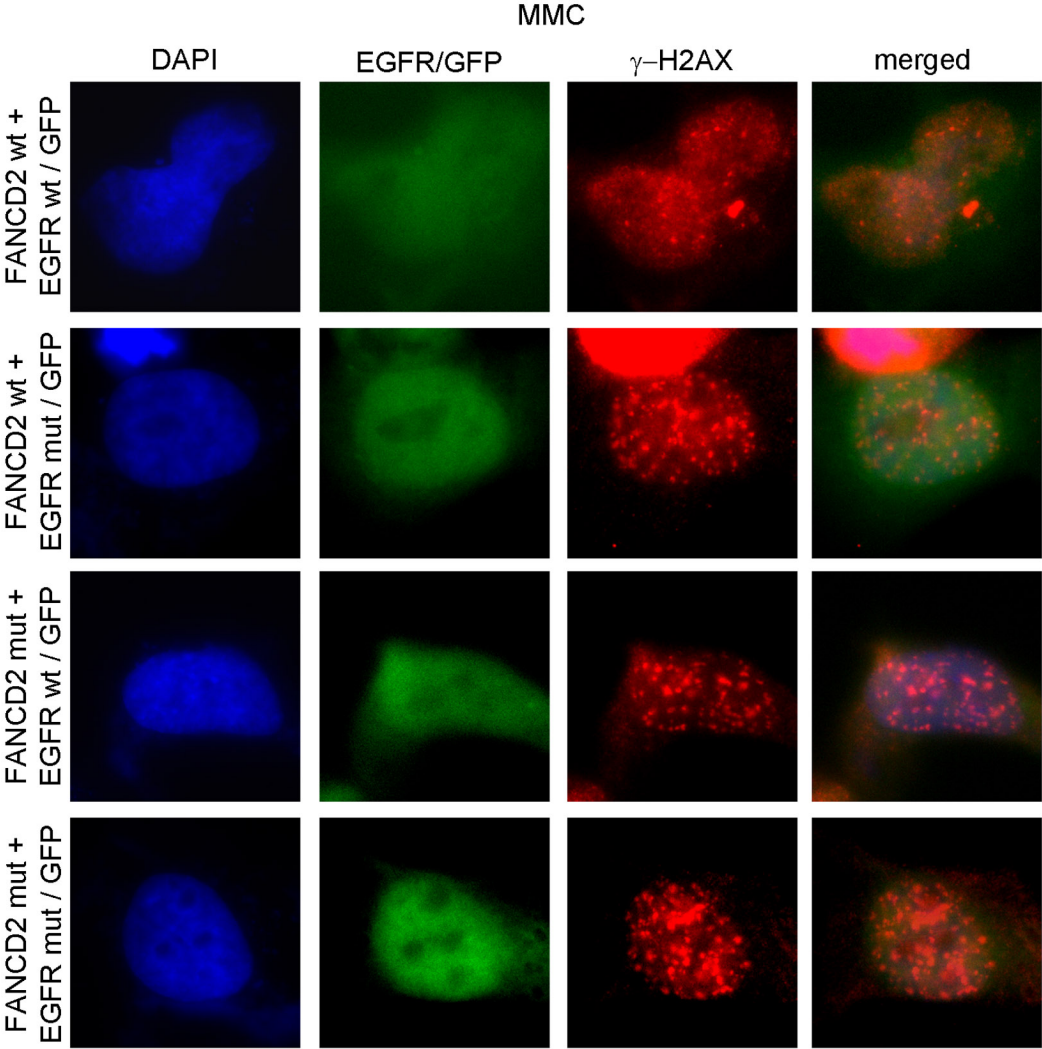

# Suppl. Fig. S5

**A**

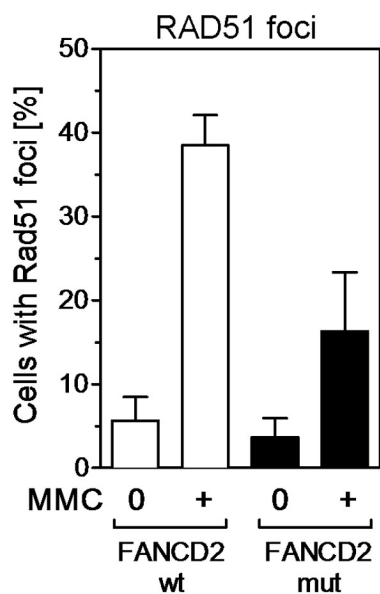

**B**

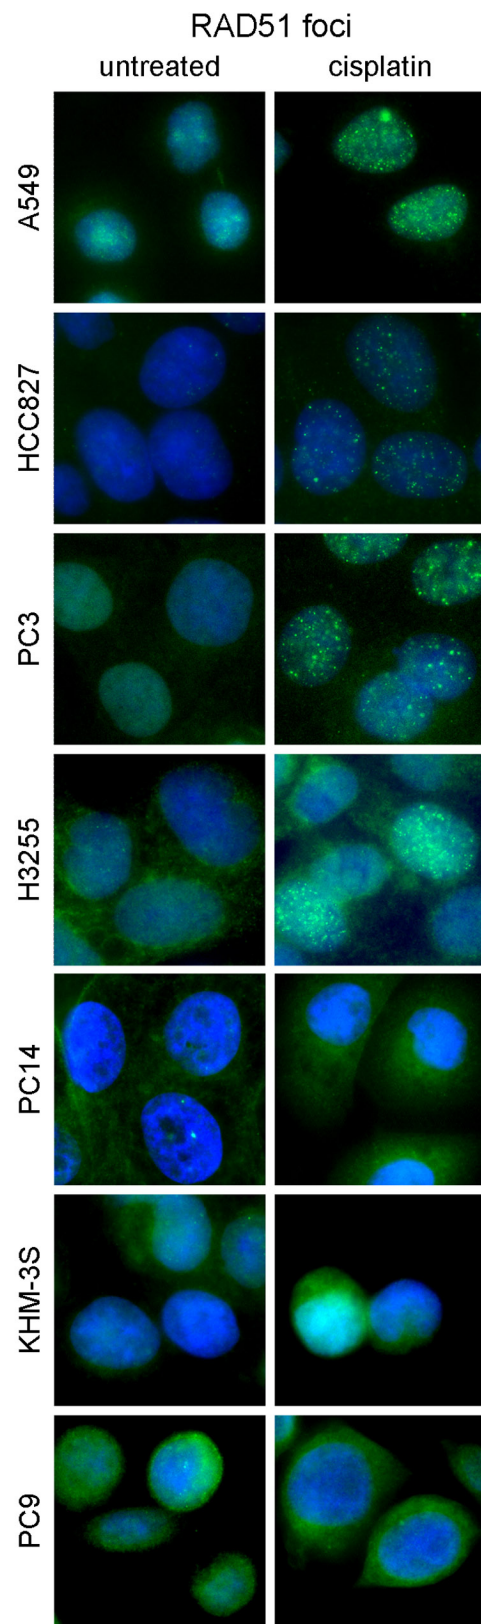

**C**

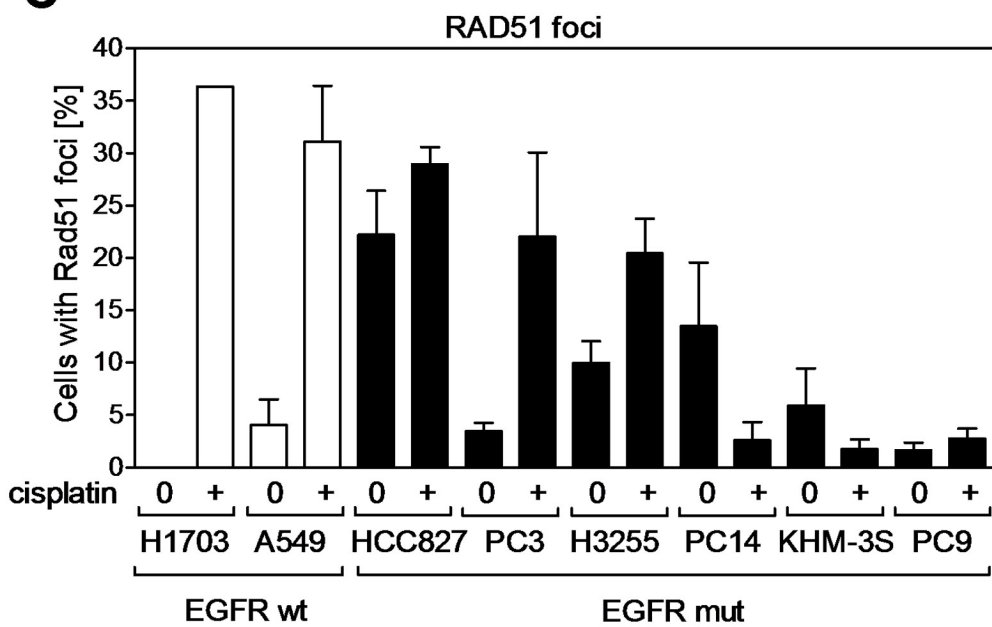



# Suppl. Fig. S5 continued

**D**

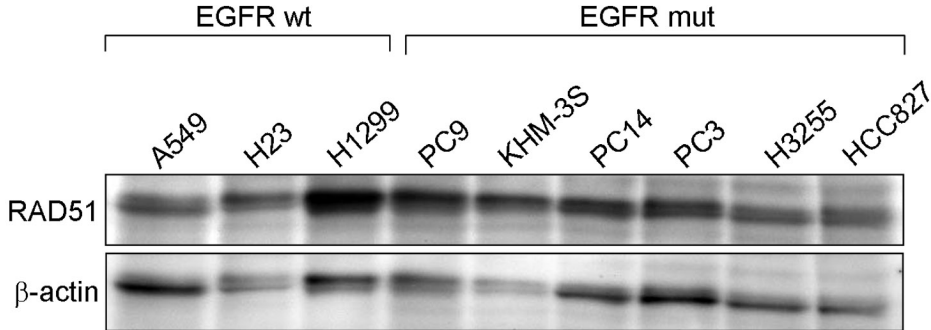

**E**

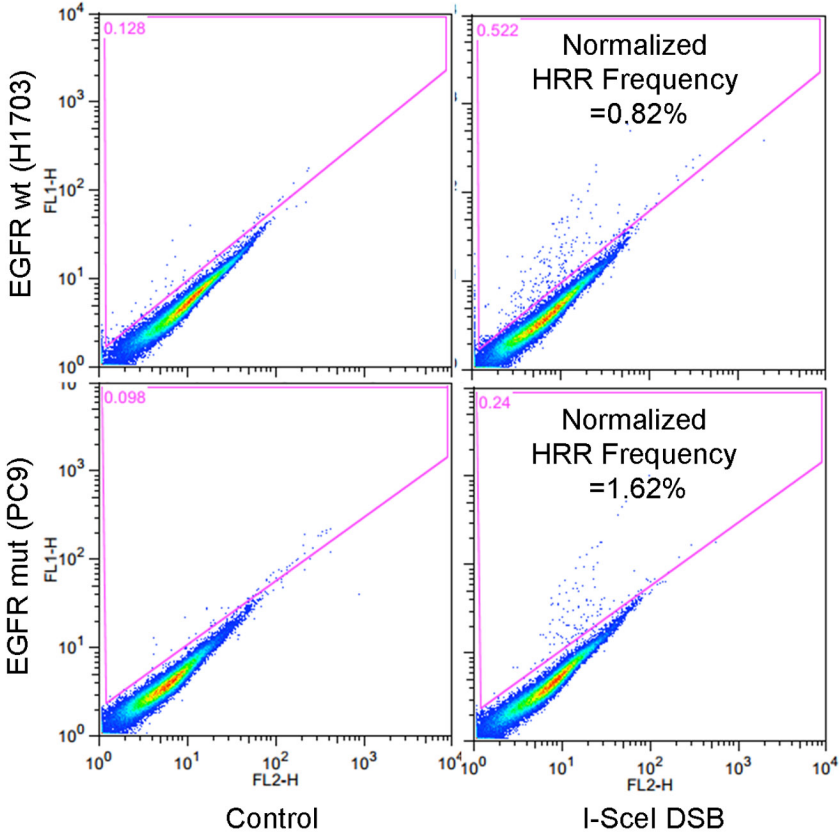

# Suppl. Fig. S6

## A

EGFR Cytoplasmic → Nuclear Translocation

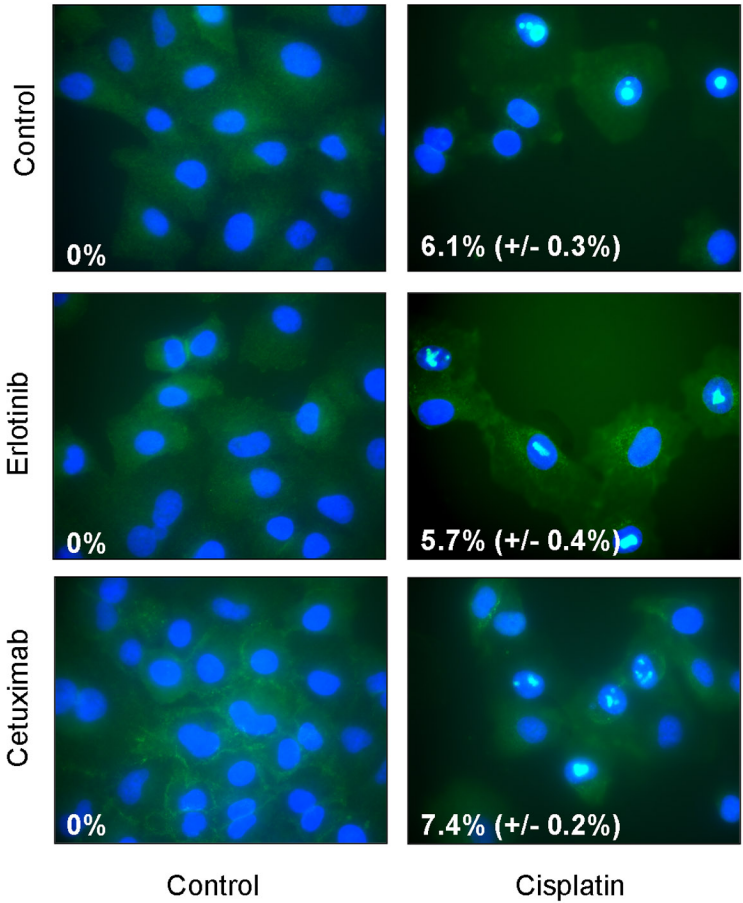

## B

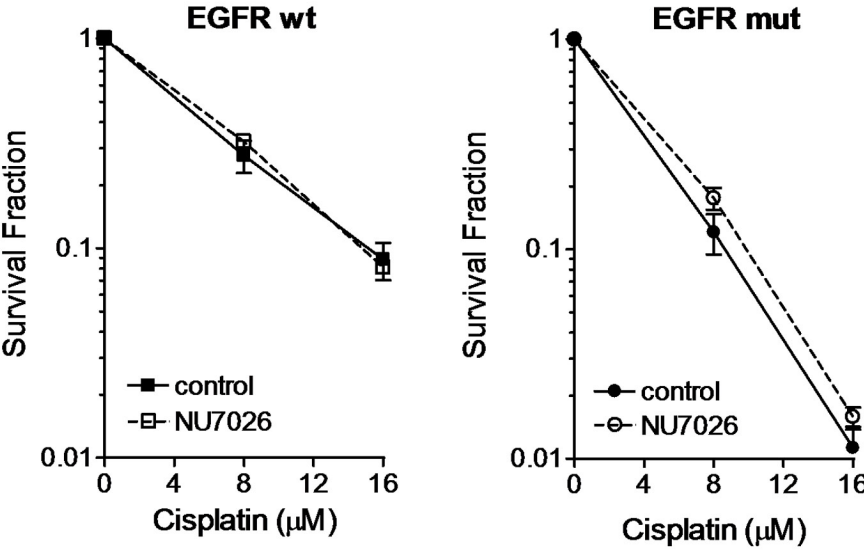

NIH3T3

# Suppl. Fig. S7

## A

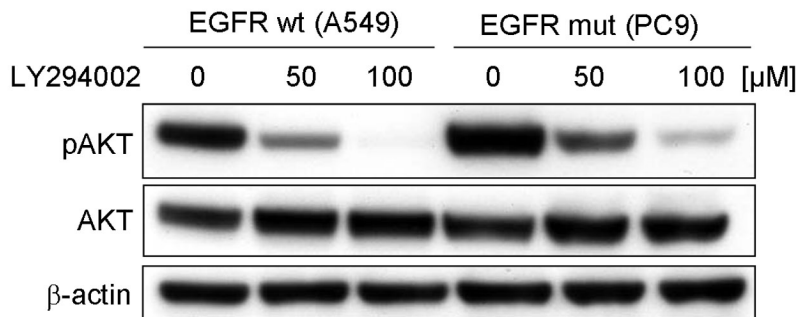

## B

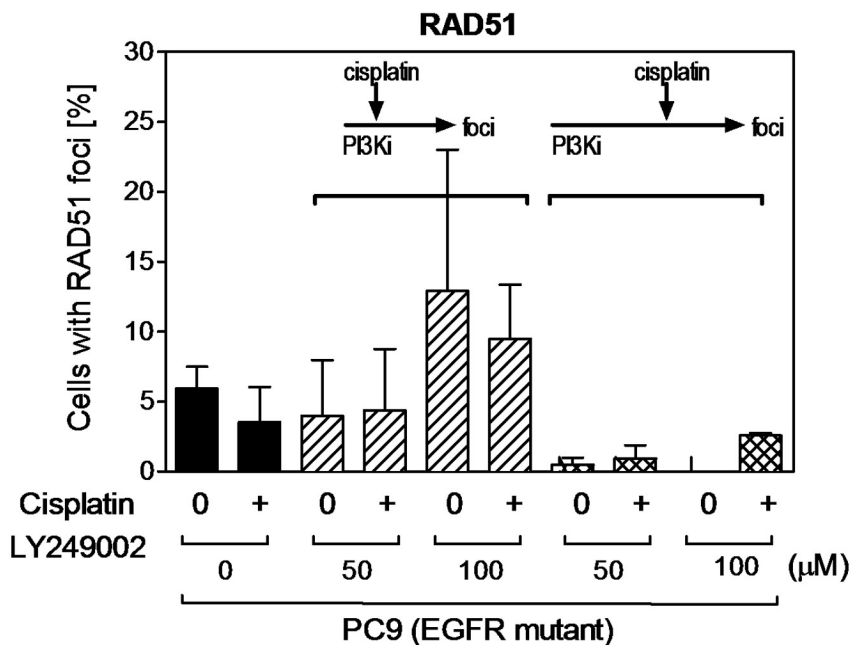

## C

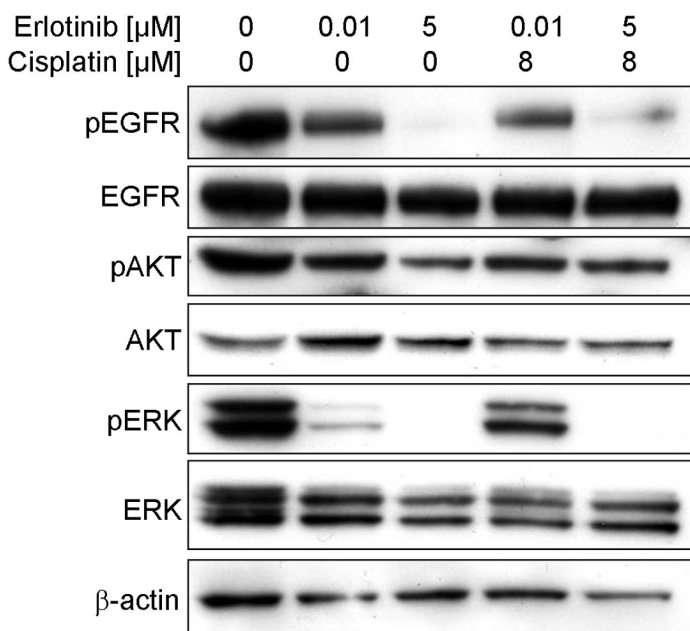

## D

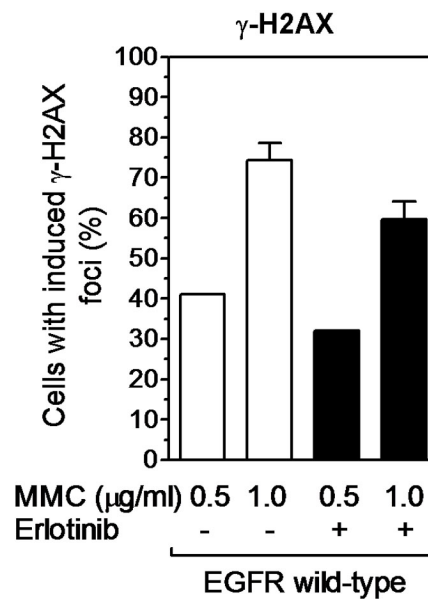

# Suppl. Fig. S7 continued

## E

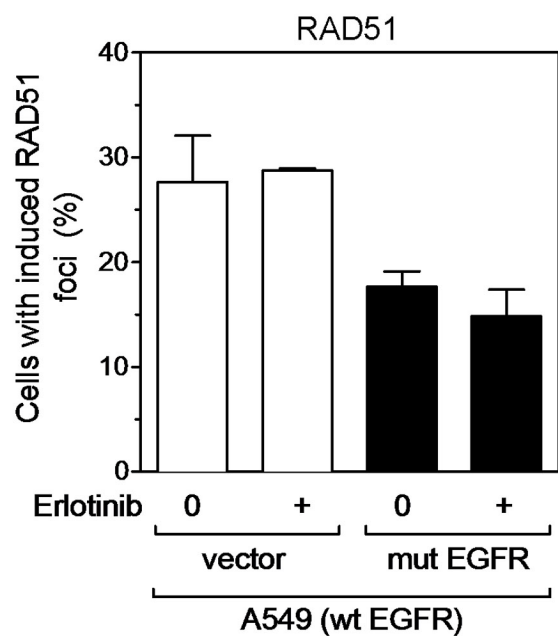

## F

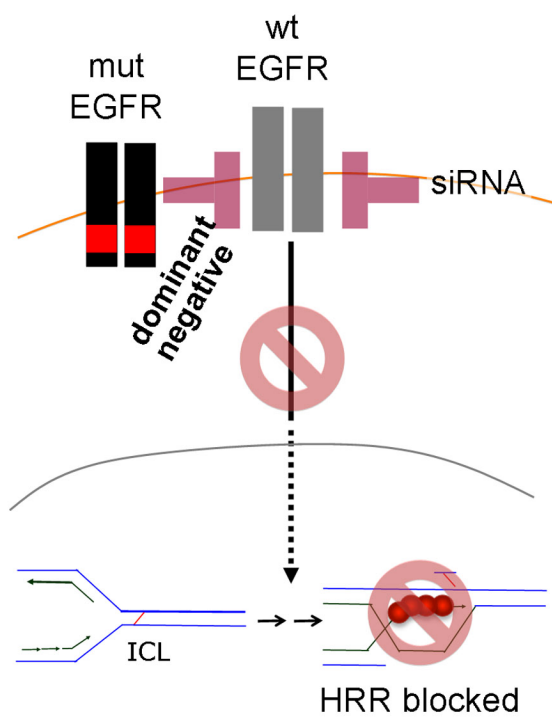

# Suppl. Fig. S8

**A**

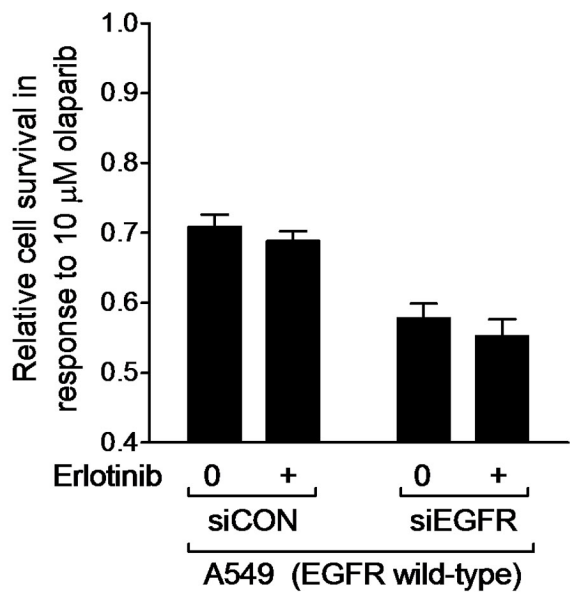

**B**

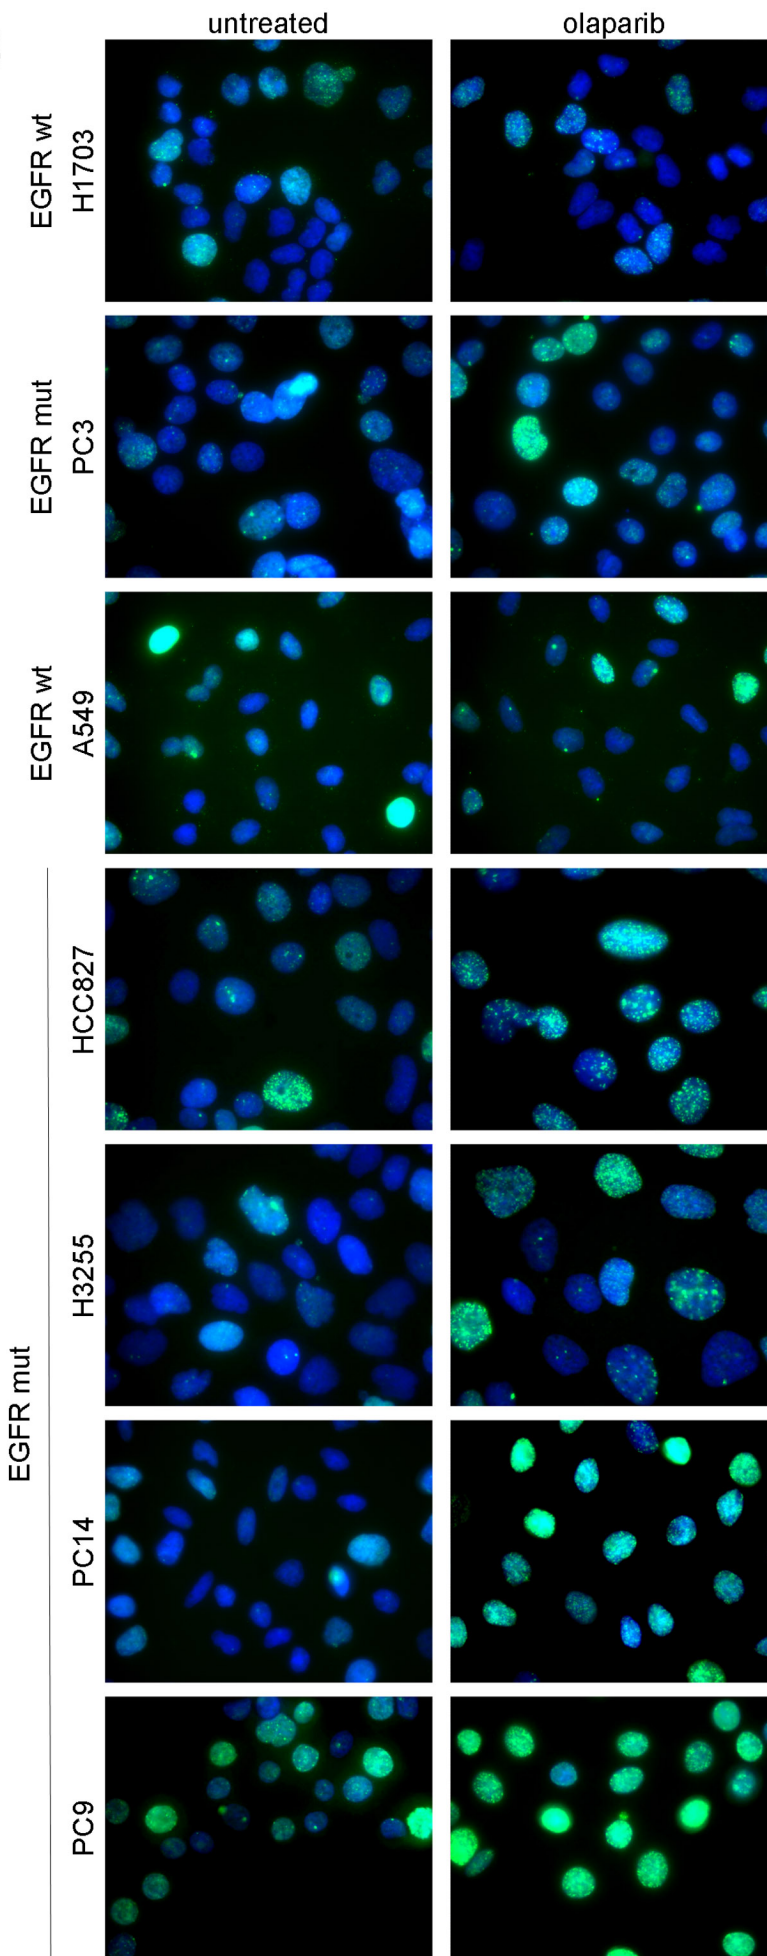

Olaparib sensitivity

# Suppl. Fig. S8 continued

C

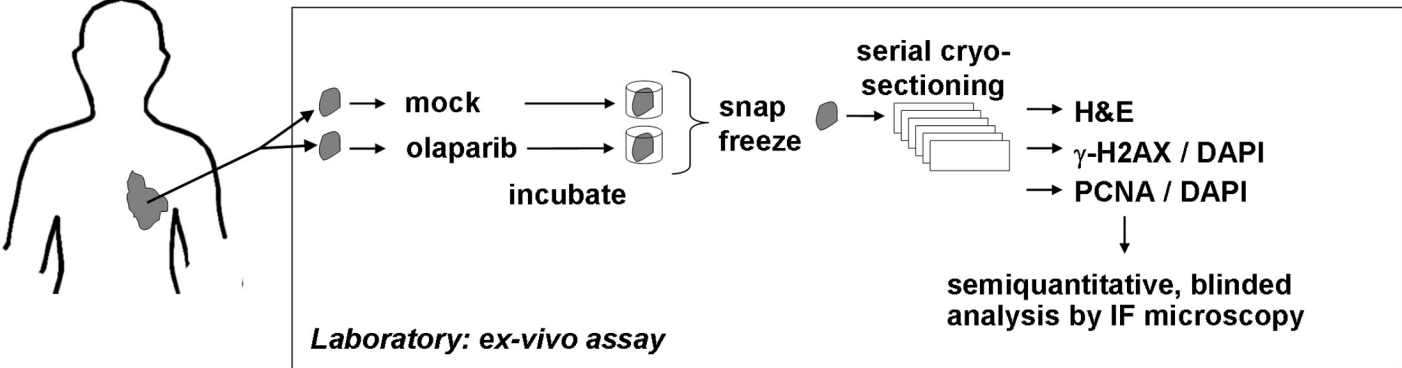

D

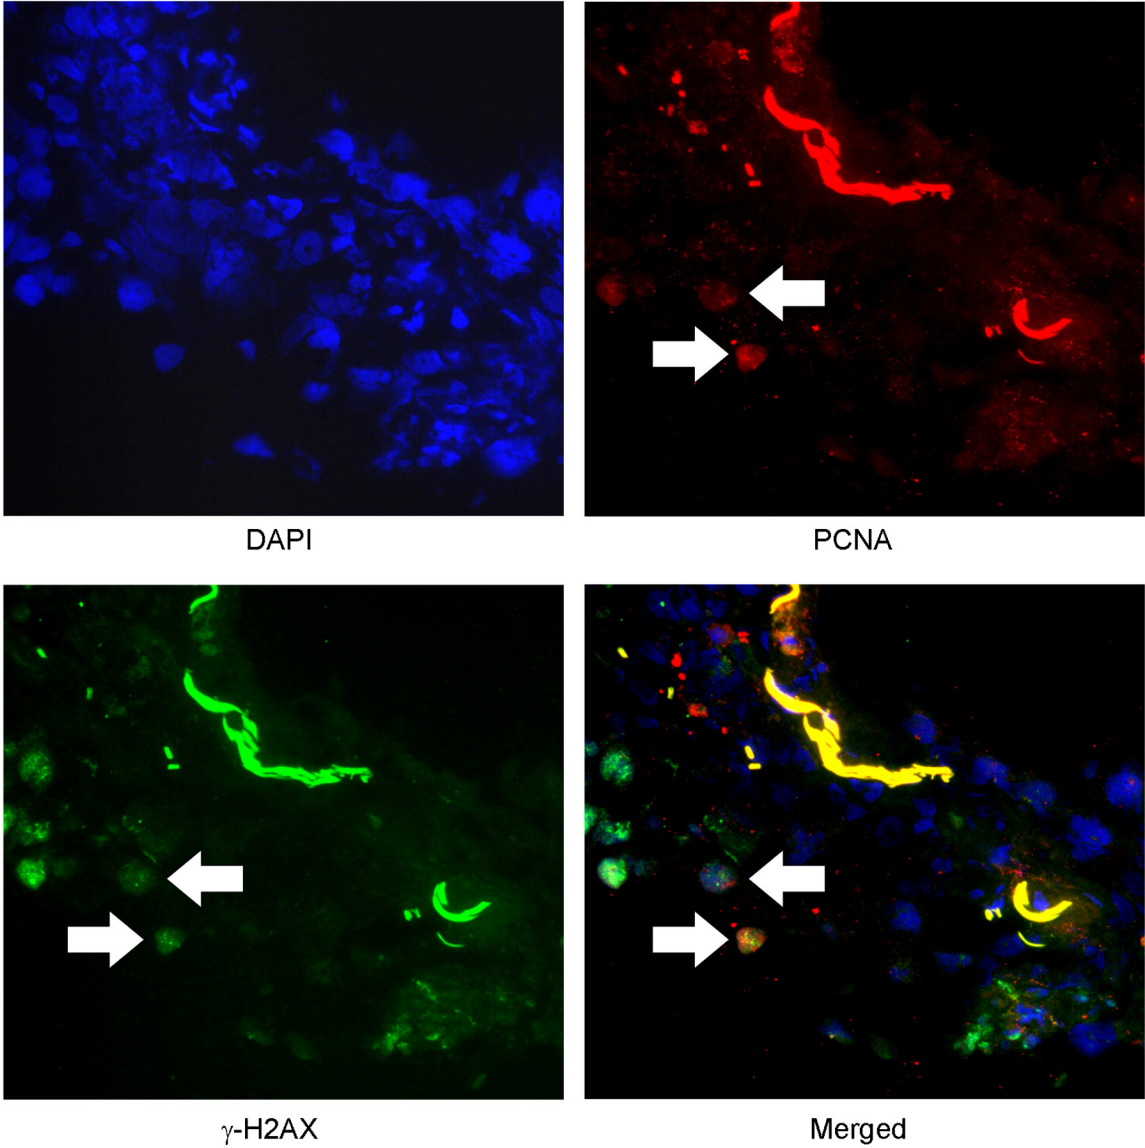

Supplement: NIHMS54568-supplement-1.pdf [file NIHMS54568-supplement-1.pdf]
