# Supplementary material
Source: PubMed Central journal article supplement (PMC3823187)
Supplement: NIHMS54568-supplement-3.pdf [file NIHMS54568-supplement-3.pdf]

## SUPPLEMENTARY REFERENCES

1. Sharma, S. V., Lee, D. Y., Li, B., Quinlan, M. P., Takahashi, F., Maheswaran, S., McDermott, U., Azizian, N., Zou, L., Fischbach, M. A., Wong, K. K., Brandstetter, K., Wittner, B., Ramaswamy, S., Classon, M., and Settleman, J. A chromatin-mediated reversible drug-tolerant state in cancer cell subpopulations. *Cell*, *141*: 69-80, 2010.
2. Birkelbach, M., Ferraiolo, N., Gheorghiu, L., Pfäffle, H. N., Daly, B., Ebright, M., Spencer, c., O'Hara, C., Whetstine, J. R., Benes, C. H., Sequist, L. V., Zou, L., Dahm-Daphi, J., Kachnic, L. A., and Willers, H. Detection of Impaired Homologous Recombination Repair in NSCLC Cells and Tissues. *J Thorac Oncol*, *8*: 279-286, 2013.
3. Liccardi, G., Hartley, J. A., and Hochhauser, D. EGFR nuclear translocation modulates DNA repair following cisplatin and ionizing radiation treatment. *Cancer Res*, *71*: 1103-1114, 2011.
4. Willers, H., Kachnic, L. A., Luo, C.-M., Li, L., Purschke, M., Borgmann, K., Held, K. D., and Powell, S. N. Biomarkers and Mechanisms of FANCD2 Function. *Journal of Biomedicine and Biotechnology*: 821529, 2008.
5. Sirbu, B. M., Lachmayer, S. J., Wulfing, V., Marten, L. M., Clarkson, K. E., Lee, L. W., Gheorghiu, L., Zou, L., Powell, S. N., Dahm-Daphi, J., and Willers, H. ATR-p53 restricts homologous recombination in response to replicative stress but does not limit DNA interstrand crosslink repair in lung cancer cells. *PLoS One*, *6*: e23053, 2011.
